# Supplementary material for: The antidepressant impact of minocycline in rodents: A systematic review and meta-analysis
Source: PubMed Central journal article supplement (PMC6342970; doi:10.1038/s41598-018-36507-9), 2019-01-22

# The antidepressant impact of minocycline in rodents: A systematic review and meta-analysis

Daniel J. Reis<sup>1,\*+</sup>, Emily J. Casteen<sup>1,+</sup>, and Stephen S. Ilardi<sup>1</sup>

<sup>1</sup>University of Kansas, Department of Psychology, Lawrence, KS, 66045, USA

\* [daniel.reis@ku.edu](mailto:daniel.reis@ku.edu)

+These authors contributed equally to this work

## PubMed Search Algorithm

| Step | Search Term                                                           |
|------|-----------------------------------------------------------------------|
| 1    | Rat* or mouse* or mice* or murine or rodent                           |
| 2    | Minocycline* or Minocin*                                              |
| 3    | 1 and 2                                                               |
| 4    | Depression or Depressed or dep* or depressive-like or depression-like |
| 5    | Antidepressant or Antidepressant-like                                 |
| 6    | Antibiotic                                                            |
| 7    | mental health*                                                        |
| 8    | Psycholo* and stress                                                  |
| 9    | 4 or 5 or 6 or 7 or 8                                                 |
| 10   | 3 and 9                                                               |

## Variable Dictionary for Supplementary Data

| Variable | Description                                                                                                                                     |
|----------|-------------------------------------------------------------------------------------------------------------------------------------------------|
| study    | Study number                                                                                                                                    |
| author   | Author name                                                                                                                                     |
| year     | Year of publication                                                                                                                             |
| tx_dur   | Duration of minocycline treatment in days                                                                                                       |
| tx_dose  | Minocycline treatment dose in billions of milligrams per kilogram                                                                               |
| tx_n     | Sample size of treatment group                                                                                                                  |
| c_n      | Sample size of control group                                                                                                                    |
| hedges   | Standardized mean difference between treatment and control group (Hedge's g) – Negative value = greater depression reduction in treatment group |
| se       | Standard error of standardized mean difference                                                                                                  |
| paradigm | Behavioral paradigm                                                                                                                             |
| measure  | Specific paradigm measure to assess for depressive-like behavior                                                                                |
| rodent   | Rodent species employed – mouse or rat                                                                                                          |
| disease  | Animal model of disease (0 = no, 1 = yes)                                                                                                       |
| dis_pre  | Minocycline treatment prior to disease induction (0 = no, 1 = yes; note – 0 for both dis_pre and dis_tre = healthy animal)                      |
| dis_tre  | Minocycline treatment following disease induction (0 = no, 1 = yes; note – 0 for both dis_pre and dis_tre = healthy animal)                     |

Supplementary Figure S1

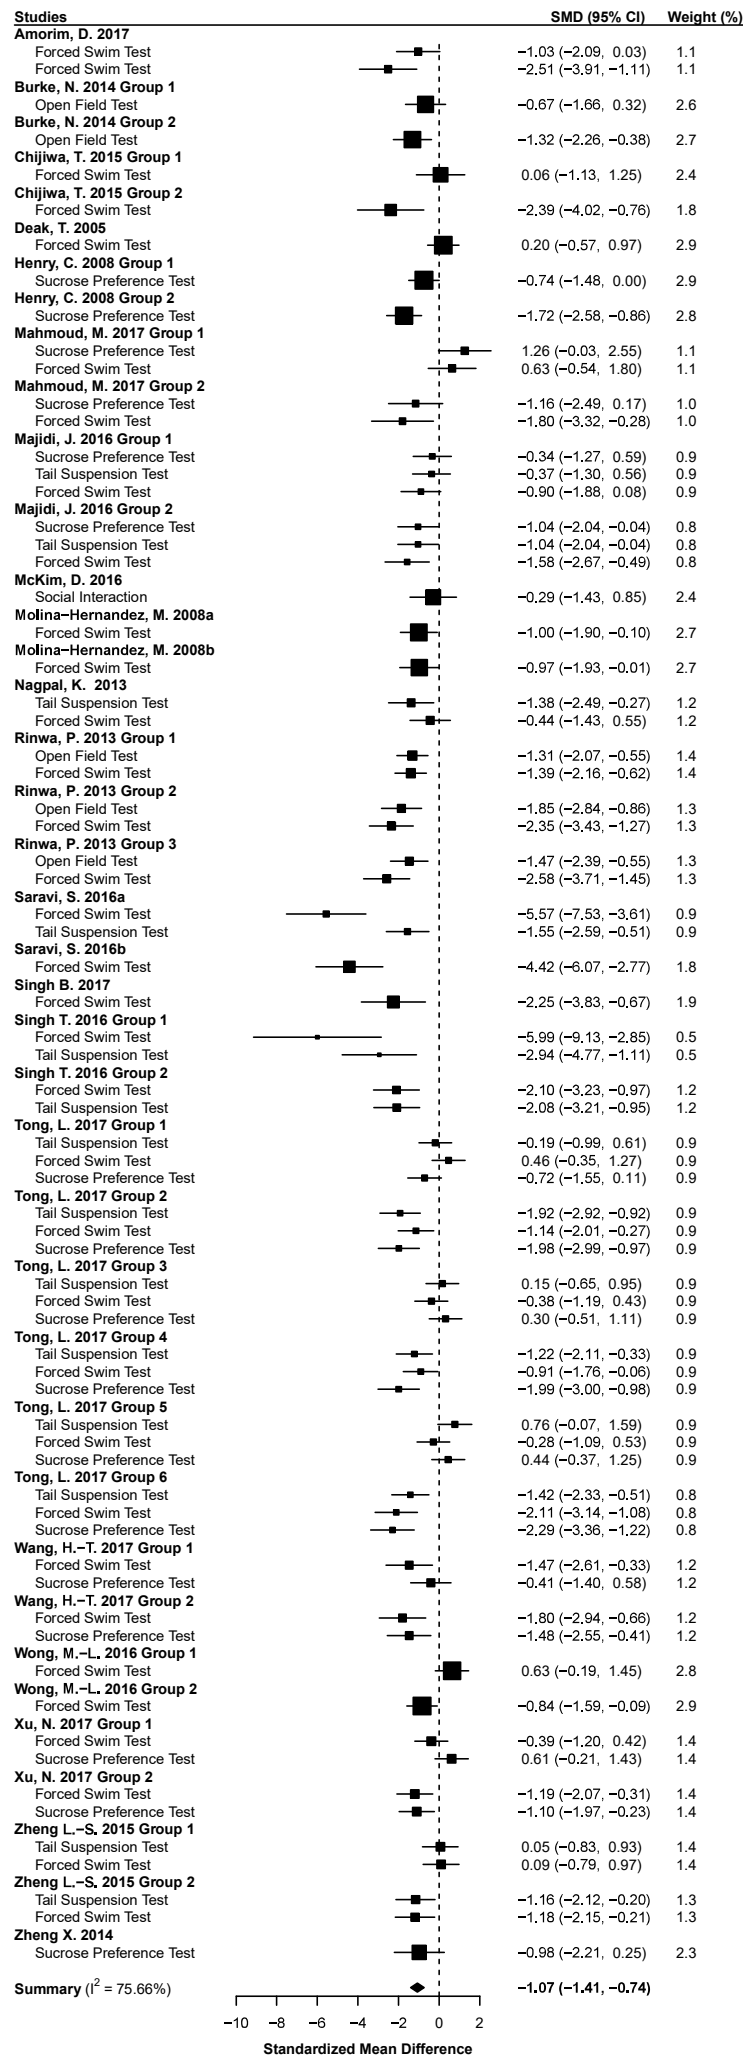

Supplement: 41598_2018_36507_MOESM1_ESM.pdf [file 41598_2018_36507_MOESM1_ESM.pdf]
